# Supplementary material for: Hierarchical MoS2–carbon porous nanorods towards atomic interfacial engineering for high-performance lithium storage
Source: Royal Society of Chemistry journal article supplement (doi:10.1039/c8ta12293h), 2019-01-01
Supplement: c8ta12293h1.pdf [file c8ta12293h1.pdf]

## Supporting Information

# Hierarchical MoS<sub>2</sub>-carbon porous nanorods towards atomic interfacial engineering for high-performance lithium storage

Zhenyou Li<sup>\*1,2,7</sup>, Alexander Ottmann<sup>1</sup>, Qing Sun<sup>1,3</sup>, Anne K. Kast<sup>6</sup>, Kai Wang<sup>8</sup>, Ting Zhang<sup>2</sup>, Hans-Peter Meyer<sup>5</sup>, Claudia Backes<sup>4</sup>, Christian Kübel<sup>7,8,9</sup>, Rasmus R. Schröder<sup>3,6</sup>, Junhui Xiang<sup>2</sup>, Yana Vaynzof<sup>1,3</sup>,  
Rüdiger Klingeler<sup>1,3</sup>

<sup>1</sup>Kirchhoff Institute of Physics, Heidelberg University, INF 227, 69120 Heidelberg, Germany

<sup>2</sup>College of Materials Science and Opto-Electronic Technology, University of Chinese Academy of Sciences, Yuquan Road 19A, Beijing, 100049 China.

<sup>3</sup>Centre for Advanced Materials (CAM), Heidelberg University, INF 225, 69120 Heidelberg, Germany

<sup>4</sup>Institute of Physical Chemistry, Heidelberg University, INF 253, 69120 Heidelberg, Germany

<sup>5</sup>Institute of Earth Sciences, Heidelberg University, INF 236, D-69120 Heidelberg, Germany

<sup>6</sup>BioQuant, Cryo Electron Microscopy, Heidelberg University, INF 267, 69120 Heidelberg, Germany

<sup>7</sup>Helmholtz Institute Ulm (HIU), Helmholtzstraße 11, D-89081 Ulm, Germany

<sup>8</sup>Institute of Nanotechnology, Karlsruhe Institute of Technology (KIT), Hermann-von-Helmholtz-Platz 1, D-76344 Eggenstein-Leopoldshafen, Germany

<sup>9</sup>Karlsruhe Nano Micro Facility (KNMF), Karlsruhe Institute of Technology (KIT), Hermann-von-Helmholtz-Platz 1, D-76344 Eggenstein-Leopoldshafen, Germany

*Author Information*

*Corresponding Authors*

\*Email: [zhenyou.li@kit.edu](mailto:zhenyou.li@kit.edu)

## Author Contributions

The manuscript was written through contributions of all authors. All authors have given approval to the final version of the manuscript.

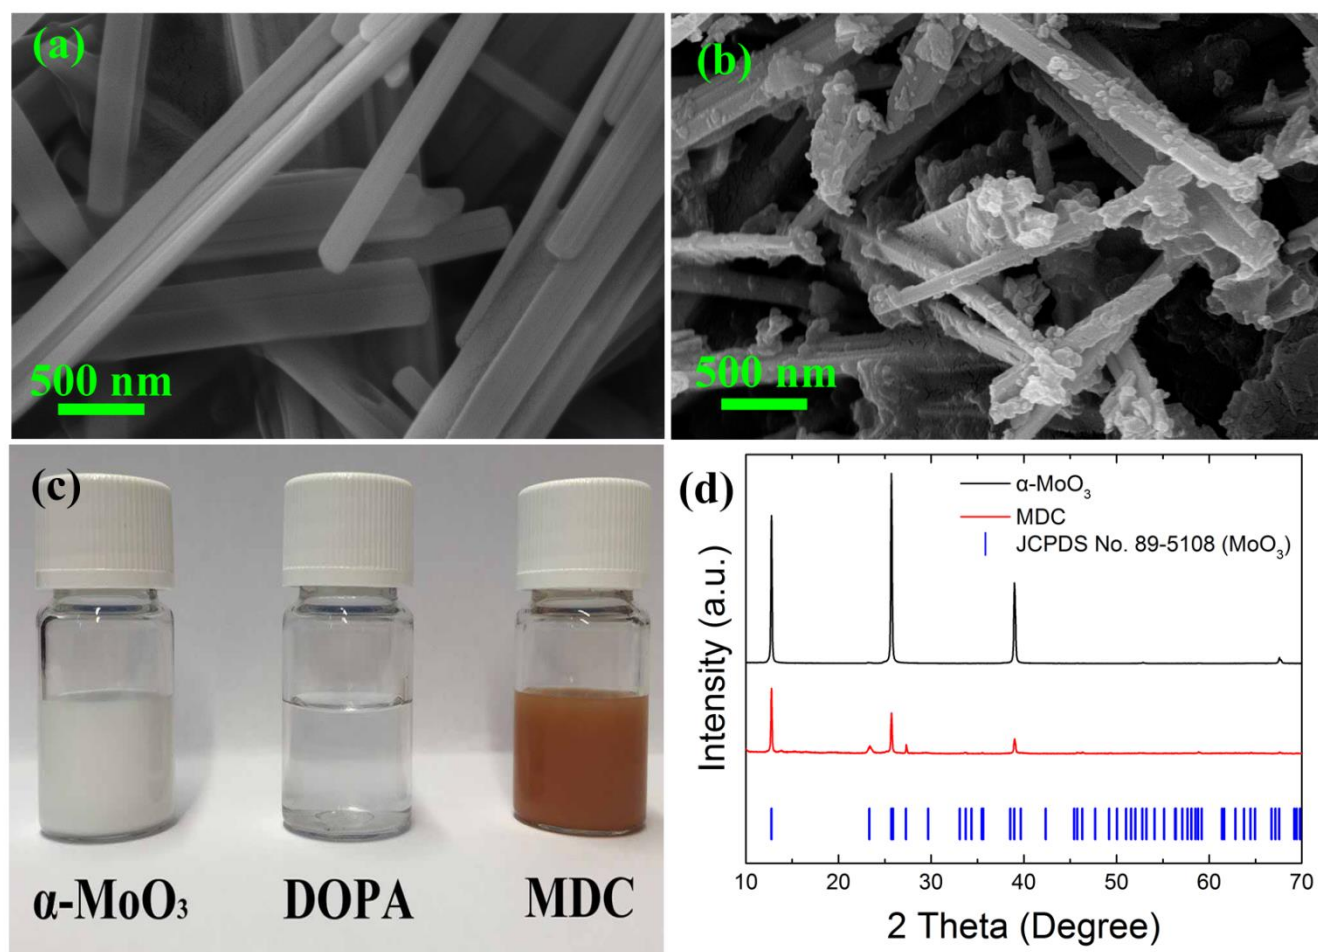

Fig. S1: SEM images of  $\alpha\text{-MoO}_3$  nanorods (a) and MDC (b); photo image of  $\alpha\text{-MoO}_3$  nanorods, DOPA and MDC water solution (c); and XRD pattern of synthesized  $\alpha\text{-MoO}_3$  nanorods, MDC, and standard pattern of  $\alpha\text{-MoO}_3$  according to JCPDS No. 89-5108 (d).

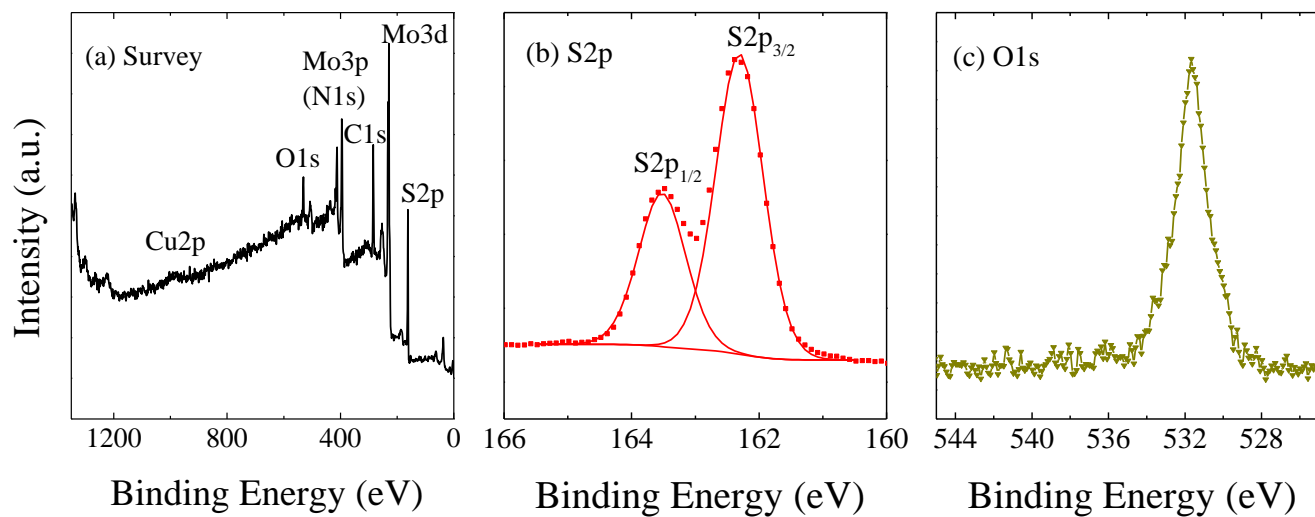

Fig. S2: XPS measurements of the MoS<sub>2</sub>/NC-PNR superstructure: (a) survey scan, (b)~(c) high resolution scans of S2p and O1s.

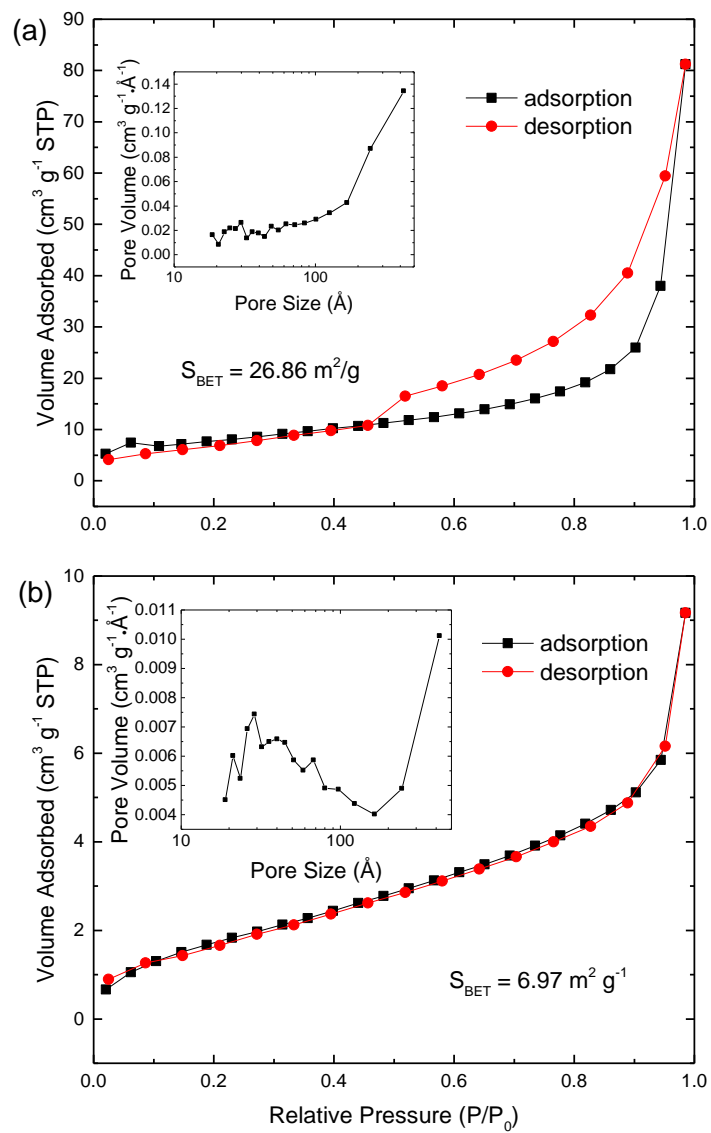

Fig. S3:  $N_2$  adsorption-desorption isotherms of (a)  $MoS_2/NC-PNR$  and (b)  $S-MoS_2$ . Insets are the pore distribution.

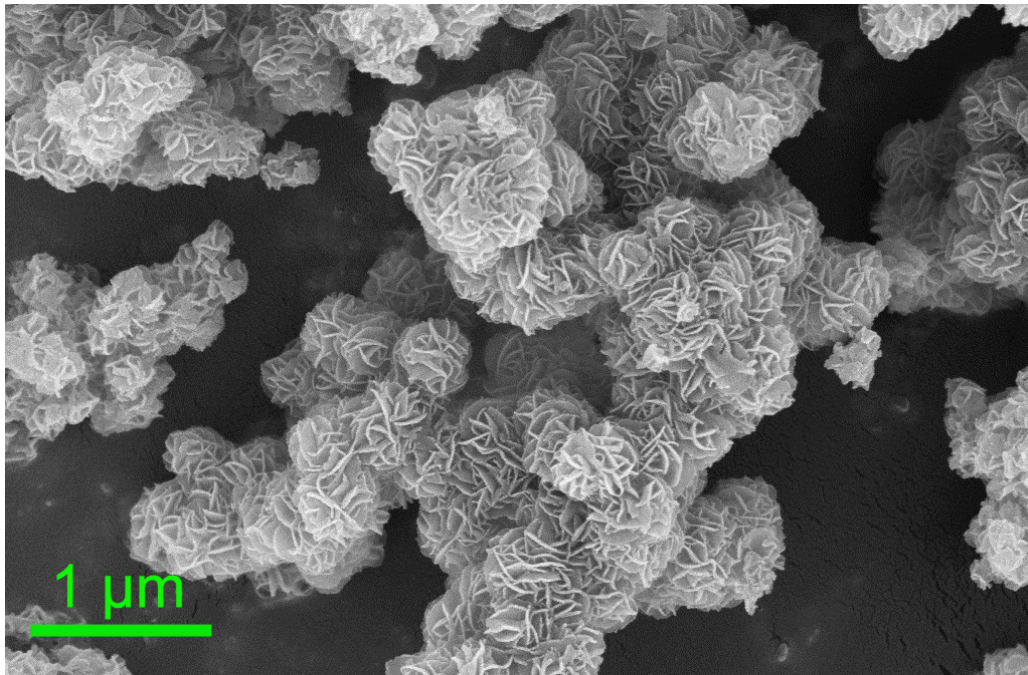

*Fig. S4: Morphology of S-MoS<sub>2</sub> synthesized by the same procedure but without adding DOPA.*

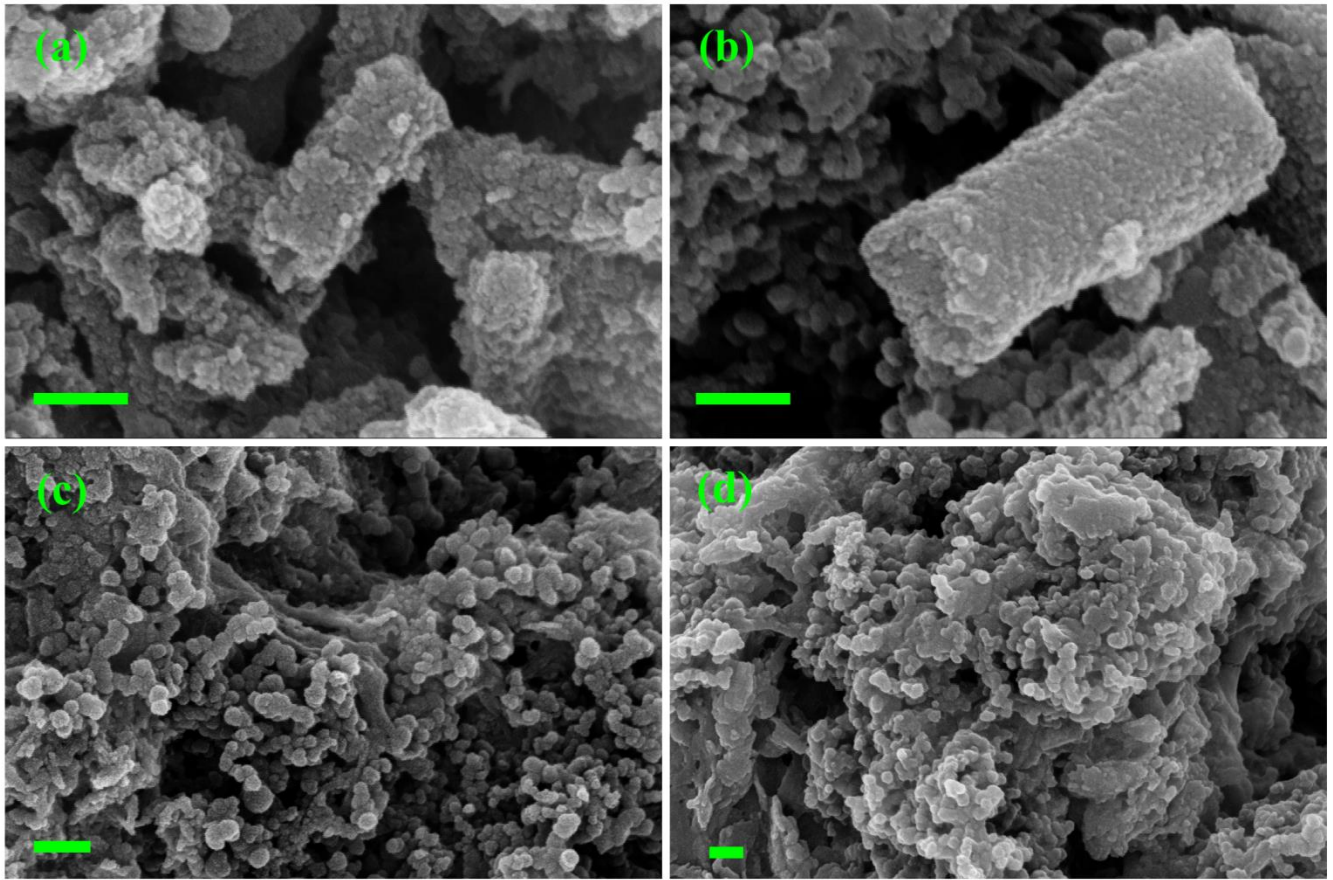

*Fig. S5: SEM images of different samples after 150 cycles at 0.5 C: a~b for MoS<sub>2</sub>/NC-PNR superstructure; c~d for S-MoS<sub>2</sub>. The scale bar is 200 nm.*

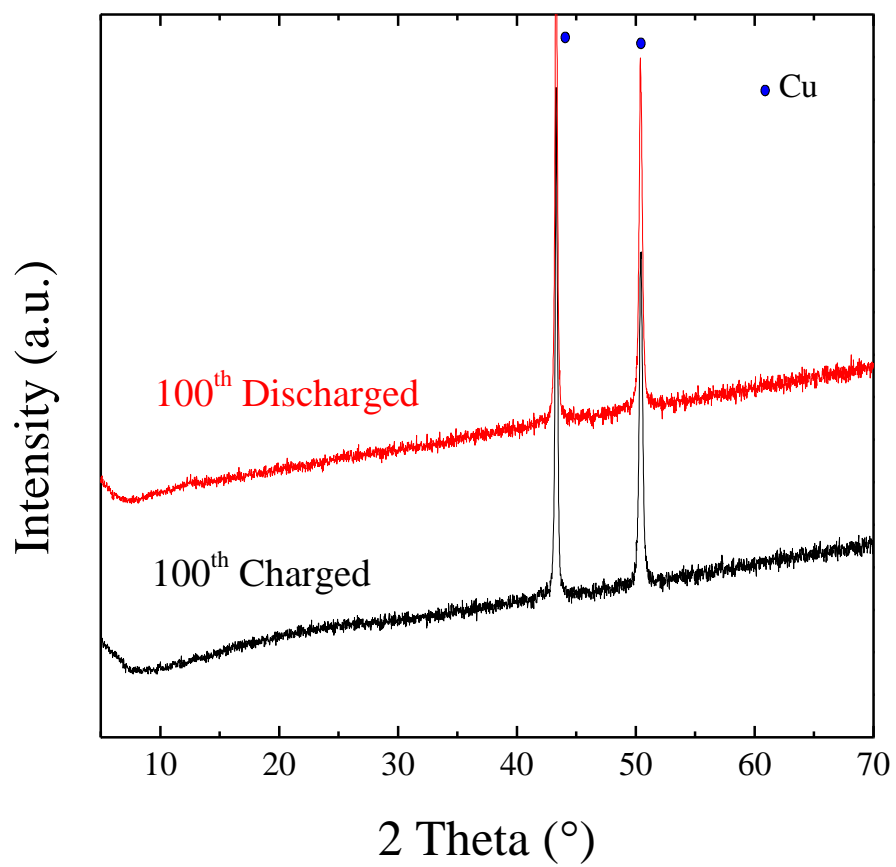

Fig. S6: XRD pattern of the MoS<sub>2</sub>/NC-PNR electrode at the 100<sup>th</sup> discharged and 100<sup>th</sup> charged states, respectively.

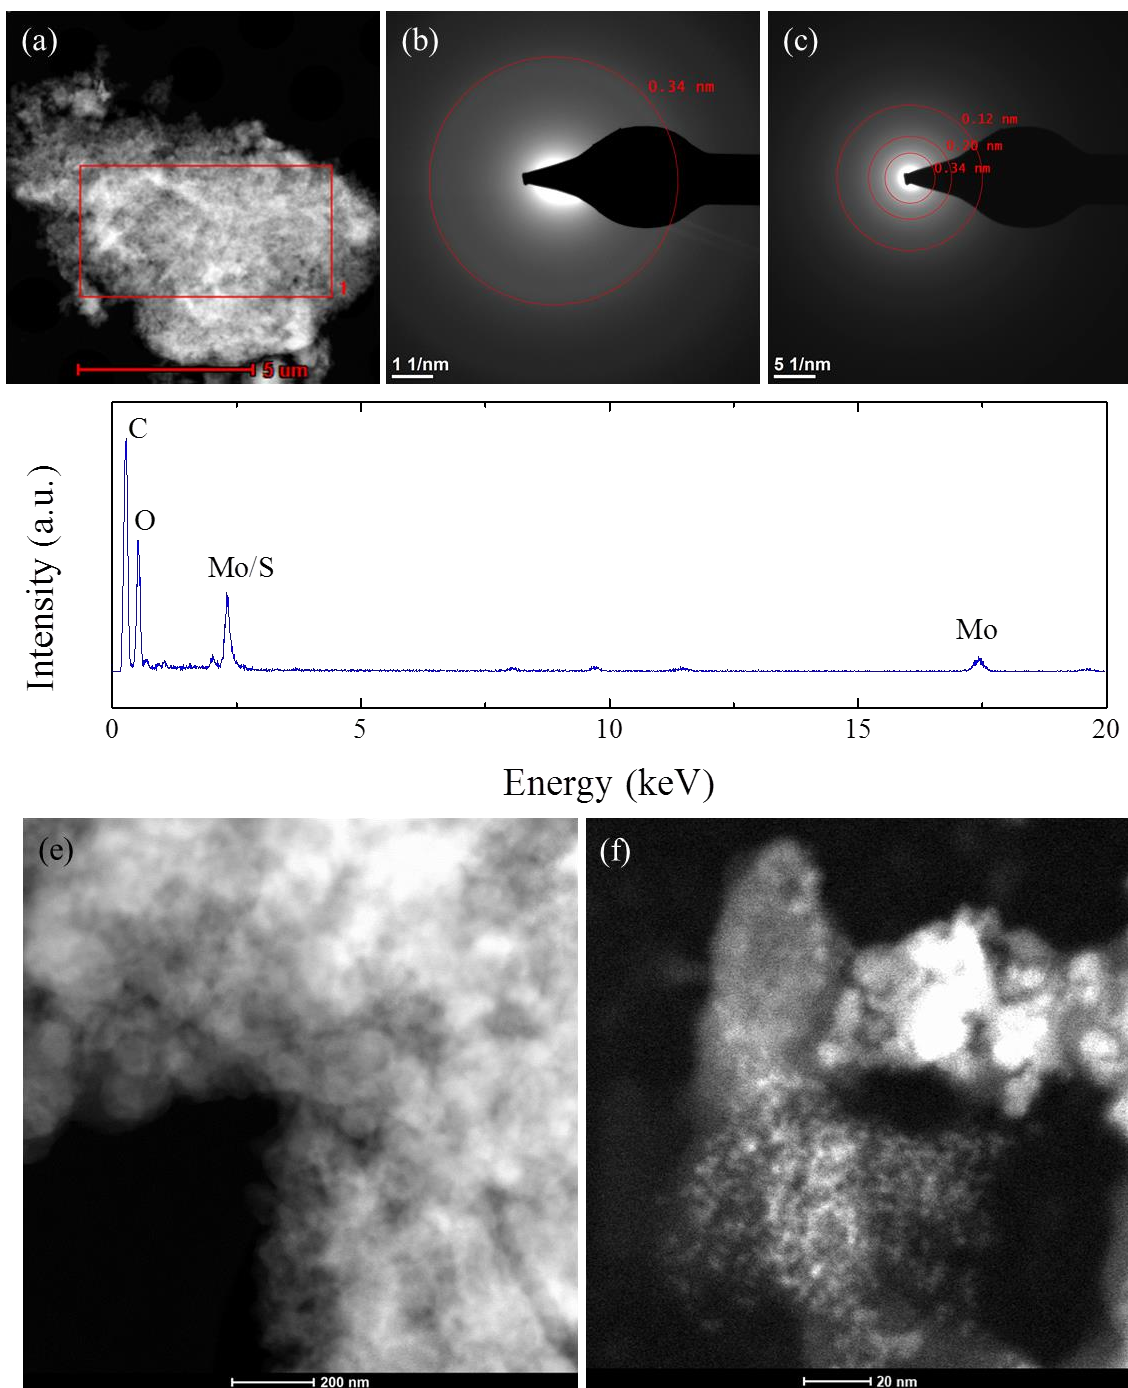

Fig. S7 S-/TEM study of the  $\text{MoS}_2/\text{NC-PNR}$  electrode at the 100<sup>th</sup> charged state: (a) HAADF-STEM image; (b)~(c): SAED patterns of (a) with different camera length, the red rings label the reflections of carbon; (d) EDX spectrum of the red square area in (a); (e)~(f) HAADF-STEM images with higher magnification.

TEM studies for the cycled electrode was performed using an aberration (image) corrected FEI Titan 80-300 microscope operated at 300 kV, equipped with a Gatan UltraScan CCD camera. The sample was prepared by dispersing the powder in dimethoxyethane, placing a drop on copper grids (Quantifoil Inc.) and taking of the residual suspension after natural drying in the glovebox.



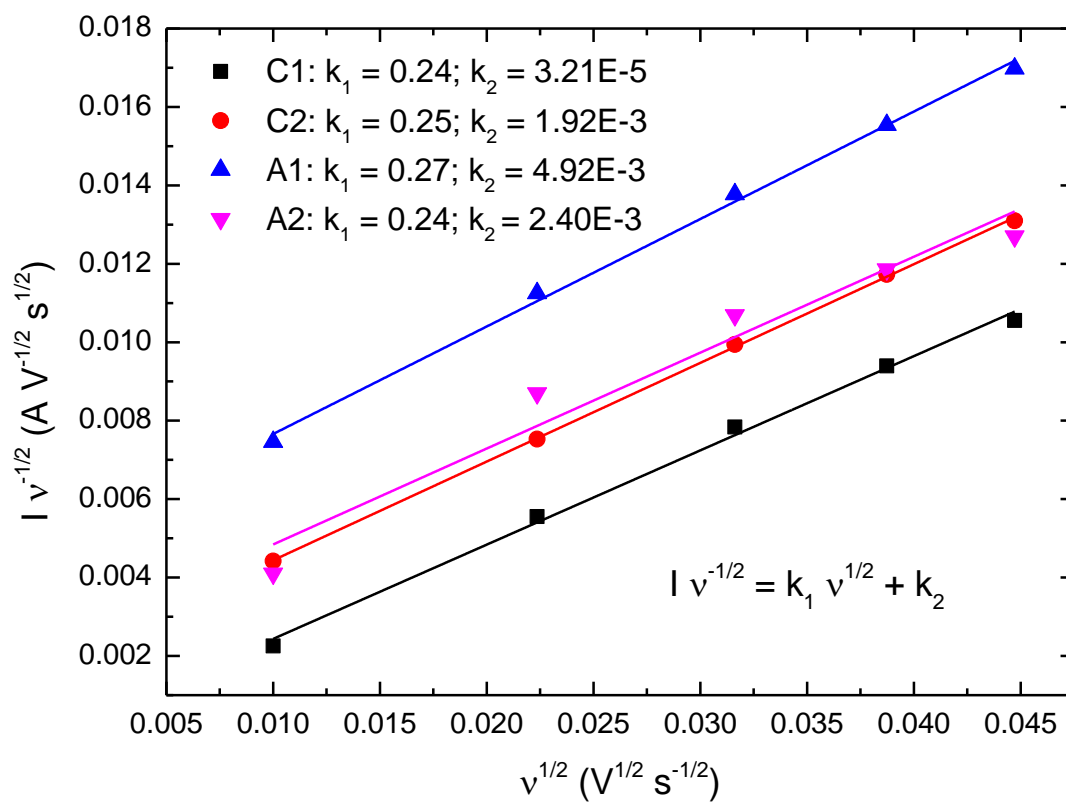

Fig. S8:  $I v^{-1/2}$  versus  $v^{1/2}$  plot of the  $\text{MoS}_2/\text{NC-PNR}$  electrode.

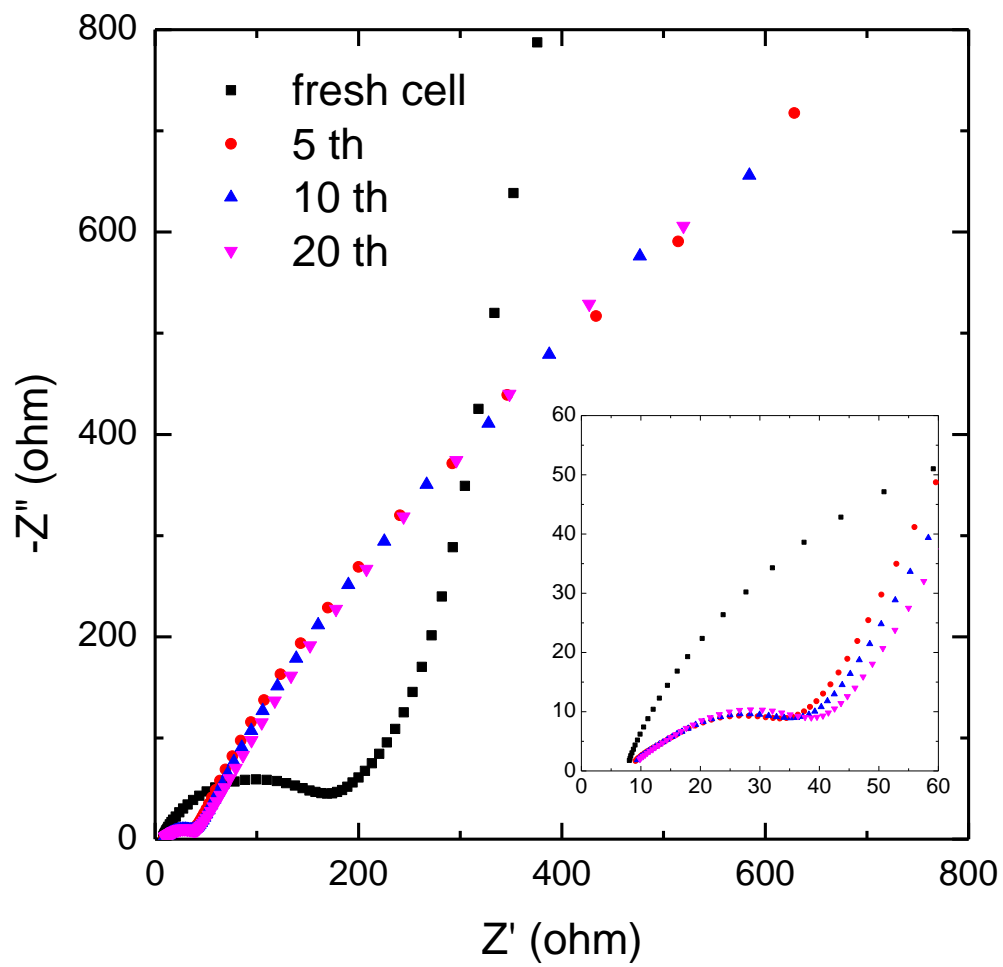

Fig. S9: Impedance measurements of the MoS<sub>2</sub>/NC-PNR electrode before and after specific cycles at 0.5 C.

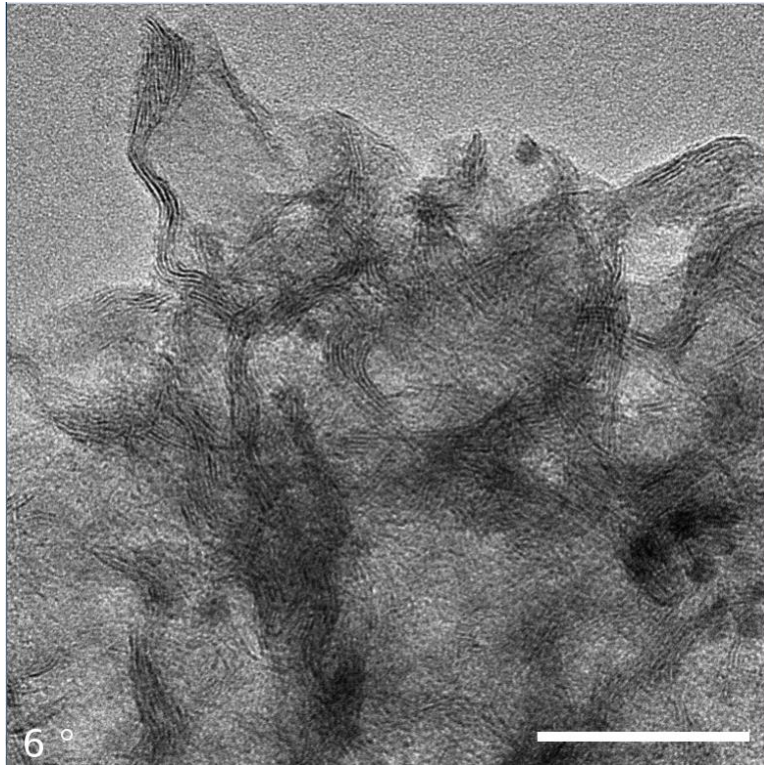

*Movie S1: HR-TEM tilt-series movie of the MoS<sub>2</sub>/NC-PNR superstructure in the range of -68° to + 64° with 1° steps. The scale bar is 50 nm.*

| MoS <sub>2</sub> hierarchical structure | MoS <sub>2</sub> content (%) | Cycling stability (cycles) | Rate capability                           |                                      | Ref.         |
|-----------------------------------------|------------------------------|----------------------------|-------------------------------------------|--------------------------------------|--------------|
|                                         |                              |                            | Specific capacity (mA h g <sup>-1</sup> ) | Current density (A g <sup>-1</sup> ) |              |
| MoS <sub>2</sub> /NC-PNR                | 74.2                         | 700                        | 925                                       | 0.067                                | Present work |
|                                         |                              |                            | 636                                       | 0.67                                 |              |
|                                         |                              |                            | 443                                       | 6.7                                  |              |
| MoS <sub>2</sub> HNS                    | -                            | 100                        | 944                                       | 0.1                                  | 1            |
|                                         |                              |                            | 762                                       | 1                                    |              |
|                                         |                              |                            | 576                                       | 5                                    |              |
| CNTs@MoS <sub>2</sub> @C                | 79.8                         | 500                        | 960                                       | 0.1                                  | 2            |
|                                         |                              |                            | 820                                       | 1                                    |              |
|                                         |                              |                            | 758                                       | 2                                    |              |
| NDG/MoS <sub>2</sub> /NDG               | 91.7                         | 600                        | 750                                       | 0.1                                  | 3            |
|                                         |                              |                            | 589                                       | 1                                    |              |
|                                         |                              |                            | 416                                       | 4                                    |              |
| sS-MoS <sub>2</sub> @C                  | 87.2                         | 100                        | 980                                       | 0.1                                  | 4            |
|                                         |                              |                            | ~830                                      | 1                                    |              |
|                                         |                              |                            | 805                                       | 5                                    |              |
| MHPC                                    | 62.3                         | 300                        | 948                                       | 0.1                                  | 5            |
|                                         |                              |                            | 725                                       | 1                                    |              |
|                                         |                              |                            | 496                                       | 10                                   |              |
| HMCM                                    | 71                           | 300                        | 915                                       | 0.1                                  | 6            |
|                                         |                              |                            | 648                                       | 1                                    |              |
|                                         |                              |                            | 481                                       | 4                                    |              |
| mesoporous-carbon/MoS <sub>2</sub>      | 45                           | 300                        | 1400                                      | 0.1                                  | 7            |
|                                         |                              |                            | 740                                       | 1                                    |              |
|                                         |                              |                            | 400                                       | 10                                   |              |
| MoS <sub>2</sub> @C nanotubes           | 82                           | 300                        | 1327                                      | 0.067                                | 8            |
|                                         |                              |                            | 993                                       | 0.67                                 |              |

|                         |    |     |     |      |   |
|-------------------------|----|-----|-----|------|---|
|                         |    |     | 850 | 3.35 |   |
| MoS <sub>2</sub> /CMK-3 | 70 | 150 | 893 | 0.1  | 9 |
|                         |    |     | 713 | 1    |   |
|                         |    |     | 391 | 8    |   |

Tab. S1: Battery performance comparison between this work and recently published MoS<sub>2</sub>-based hierarchical structures.

## Reference

1. Y. Wang, L. Yu and X. W. Lou, *Angew. Chem.-Int. Edit.*, 2016, **55**, 7423-7426.
2. Z. Zhang, H. Zhao, Y. Teng, X. Chang, Q. Xia, Z. Li, J. Fang, Z. Du and K. Świerczek, *Advanced Energy Materials*, 2018, **8**, 1700174.
3. B. Chen, Y. Meng, F. He, E. Liu, C. Shi, C. He, L. Ma, Q. Li, J. Li and N. Zhao, *Nano Energy*, 2017, **41**, 154-163.
4. B. Guo, K. Yu, H. Song, H. Li, Y. Tan, H. Fu, C. Li, X. Lei and Z. Zhu, *Nanoscale*, 2016, **8**, 420-430.
5. S.-K. Park, J. Lee, S. Bong, B. Jang, K.-d. Seong and Y. Piao, *ACS Appl. Mater. Interfaces*, 2016, **8**, 19456-19465.
6. Z. Bai, Y. Zhang, Y. Zhang, C. Guo and B. Tang, *Chemistry – A European Journal*, 2015, **21**, 18187-18191.
7. Y. Fang, Y. Lv, F. Gong, A. A. Elzatahry, G. Zheng and D. Zhao, *Adv. Mater.*, 2016, **28**, 9385-9390.
8. X. Zhang, X. Li, J. Liang, Y. Zhu and Y. Qian, *Small*, 2016, **12**, 2484-2491.
9. X. Xu, Z. Fan, X. Yu, S. Ding, D. Yu and X. W. D. Lou, *Advanced Energy Materials*, 2014, **4**, 1400902.
